# Supplementary material for: Comparison of the impact of allelic polymorphisms in PfAMA1 on the induction of T Cell responses in high and low malaria endemic communities in Ghana
Source: Springer Nature journal article supplement (doi:10.1186/s12936-021-03900-1), 2021-09-10

**A**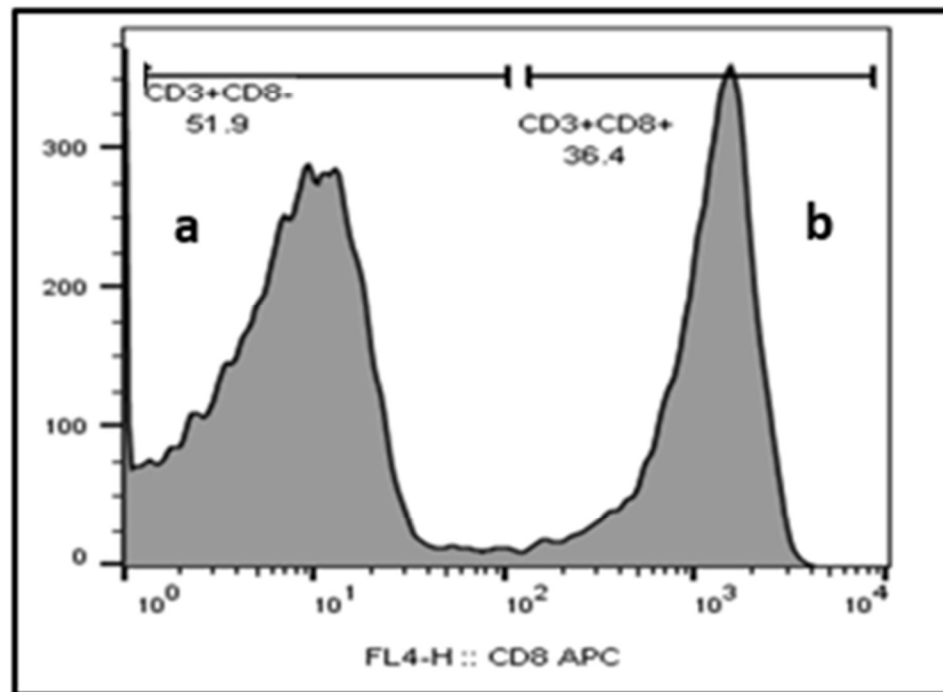**B**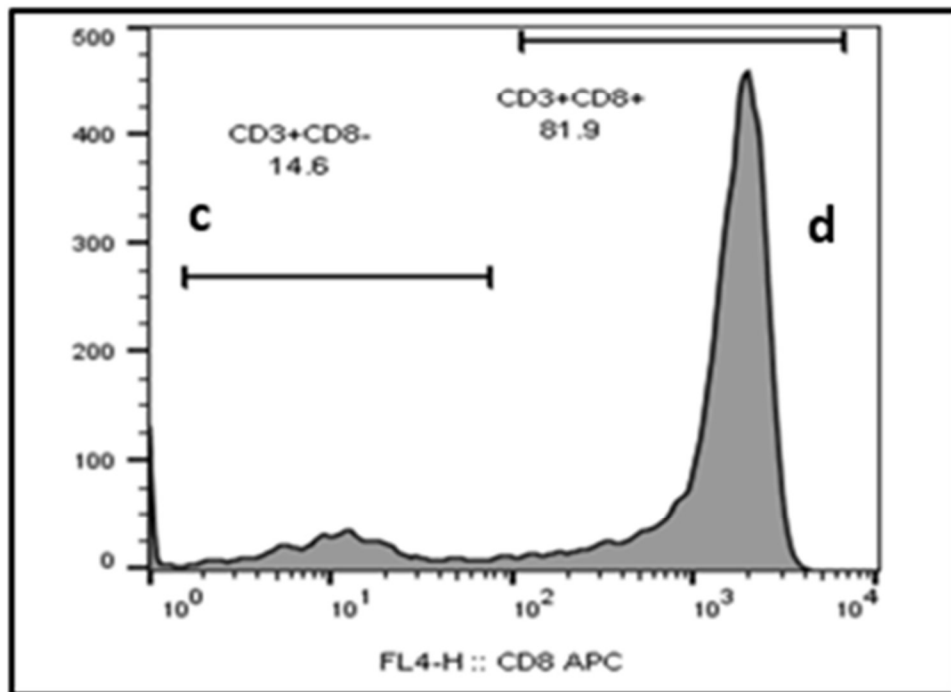

Supplement: MOESM2 [file 19652262]
